# Supplementary material
Source: ML conference proceedings conference paper supplement (https://openaccess.thecvf.com/content/WACV2025/html/Bhat_PC-GZSL_Prior_Correction_WACV_2025_paper.html)
Supplement: Supplementary file 1 [file Bhat_PC-GZSL_Prior_Correction_WACV_2025_supplemental.pdf]

# Supplementary: “PC-GZSL: Prior Correction for Generalized Zero Shot Learning”

S Divakar Bhat   Amit More   Mudit Soni   Bhuvan Aggarwal  
Honda R&D Co., Ltd.  
Tokyo, Japan

## 1. Proposed Algorithm

We present the summary of our approach in the form of a pseudo-code in **Algorithm 1**. Proposed approach is quite simple, the overall steps involve computing seen unseen prior  $P(\mathcal{Y})$  using total number of samples  $n_s$  and  $n_u$  for respective case. Similarly, using ground truth data, the number of samples for each class are computed to estimate  $P^t(y)$ . Finally, model bias or effective prior is computed as an empirical average of  $P^m(y|x_i)$  for  $x_i$  in validation dataset using original trained model. The last step involves, tuning the parameters  $\alpha$  and  $\beta$  which give best harmonic mean accuracy. It is noted that, validation data and test data must have the same prior distribution  $P^t(y)$ .

## 2. Additional analysis on CUB and AWA2

We show in Figure 1 the confusion between seen and unseen classes. The top row show results for CUB and bottom

|     |        | Baseline |        | PC    |        |      |
|-----|--------|----------|--------|-------|--------|------|
| +Ve | Seen   | 0.87     | 0.36   | 0.8   | 0.76   | CUB  |
|     |        | 0.11     | 0.6    | 0.078 | 0.11   |      |
|     |        | 0.015    | 0.04   | 0.13  | 0.13   |      |
| -Ve | Unseen |          |        |       |        |      |
|     |        |          |        |       |        |      |
|     |        |          |        |       |        |      |
|     |        |          |        |       |        |      |
| +Ve | Seen   | 0.96     | 0.4    | 0.88  | 0.78   | AWA2 |
|     |        | 0.039    | 0.53   | 0.031 | 0.053  |      |
|     |        | 0.0056   | 0.064  | 0.085 | 0.16   |      |
| -Ve | Unseen |          |        |       |        |      |
|     |        |          |        |       |        |      |
|     |        |          |        |       |        |      |
|     |        | Seen     | Unseen | Seen  | Unseen |      |

Figure 1. We show the confusion between seen and unseen classes for incorrectly classified examples for the CUB and AWA2 datasets.

---

### Algorithm 1 Algorithm for model prior correction

---

**Input:**

Trained model  $M$

Validation data  $(x_i, y_i)_{i=1}^{n_s}$  and  $(x_i, y_i)_{i=1}^{n_u}$

**Output:**

Adjusted model  $M^a$

**Start:**

**Compute the adjustment terms**

$$P(\mathcal{Y}) = \begin{cases} \frac{n_s}{n_s+n_u} & \text{if } y \in \mathcal{Y}_s \\ \frac{n_u}{n_s+n_u} & \text{otherwise} \end{cases}$$

$$P^t(y) = \frac{1}{n_s+n_u} \sum_i^{n_s+n_u} 1_{hot}(y_i)$$

$$P^m(y) = \frac{1}{n_s+n_u} \sum_i^{n_s+n_u} M(x_i)$$

**Tune the adjustment strength**

**for**  $(\alpha = 0, \alpha < 2, \alpha+ = 0.1)$  **do**

**for**  $(\beta = 0, \beta < 2, \beta+ = 0.1)$  **do**

$$y_i^{pred} = ArgMax \left( M(x_i) \cdot \left( \frac{P^t(y)}{P^m(y)} \right)^\alpha \cdot P(\mathcal{Y})^\beta \right)$$

**h** = Get\_Harmonic\_Mean\_Acc  $(y, y^{pred})$

**if** **h** is the best

$$(\alpha^*, \beta^*) = (\alpha, \beta)$$

**end for**

**end for**

$$M^a = \left( \frac{P^t(y)}{P^m(y)} \right)^{\alpha^*} P(\mathcal{Y})^{\beta^*} \cdot M$$

**Return**  $M^a$

**End**

---

row is for AWA2 dataset. One may note that, accuracy numbers in the 1st row (+Ve detections) for each case improves when using PC. Similarly, the bias of unseen classes toward

the seen classes (-Ve detections classified into Seen classes) is lower for PC.

### 3. Ablation on AwA2

Table 1 and Table 2 show results on AwA2 dataset where each component for the adjustment is tested for its effectiveness.

| $\log \frac{P^t(y)}{P^m(y)}$ | $\log P(\mathcal{Y})$ | $\mathcal{U}$ | $\mathcal{S}$ | $\mathcal{H}$ | A           |
|------------------------------|-----------------------|---------------|---------------|---------------|-------------|
| AwA2                         |                       |               |               |               |             |
| X                            | X                     | 34.9          | 95.3          | 51.1          | 63.9        |
| ✓                            | X                     | 71.0          | 88.1          | 78.6          | 82.3        |
| X                            | ✓                     | 46.9          | 94.0          | 62.6          | 69.6        |
| ✓                            | ✓                     | 72.7          | 87.6          | <b>79.5</b>   | <b>82.7</b> |

Table 1. We show contribution of individual adjustment terms in removing seen unseen class bias for AwA2.

| Adjustment                   | $\mathcal{U}$ | $\mathcal{S}$ | $\mathcal{H}$ | A           |
|------------------------------|---------------|---------------|---------------|-------------|
| AwA2                         |               |               |               |             |
| -                            | 34.9          | 95.3          | 51.1          | 63.9        |
| $\log P^t(y)$                | 59.8          | 89.5          | 71.7          | 80.6        |
| $\log P^m(y)$                | 44.6          | <b>92.8</b>   | 60.2          | 64.2        |
| $\log \frac{P^t(y)}{P^m(y)}$ | <b>71.0</b>   | 88.1          | <b>78.6</b>   | <b>82.3</b> |

Table 2. The effectiveness of bias removal using  $\log P^t(y)$  and  $\log P^m(y)$  terms for AwA2.
